1 **OCCURRENCE OF AVIAN REOVIRUS AND PICOBIRNAVIRUS IN WILD BIRDS**  
2 **IN AN ENVIRONMENTAL PROTECTION AREA IN THE AMAZON BIOME, PARÁ,**  
3 **BRAZIL**

4  
5 Diego Pereira<sup>1</sup> (ORCID: 0000-0002-2612-4672); Lizandra Caroline dos Santos Souto<sup>2</sup>  
6 (ORCID: 0000-0002-2456-6215); Sylvia de Fátima dos Santos Guerra<sup>2</sup> (ORCID: 0000-0002-  
7 5830-0810); Edvaldo Tavares da Penha Júnior<sup>2</sup>; Patrícia dos Santos Lobo<sup>2</sup> (ORCID: 0000-  
8 0003-0209-6969); Luana da Silva Soares<sup>2</sup> (ORCID: 0000-0001-9509-4019); Helder Henrique  
9 Costa Pinheiro<sup>4</sup> (ORCID: 0000-0001-5567-3550); Elaine Hellen Nunes Chagas<sup>6</sup> (ORCID:  
10 0000-0002-36231711); Bruna Alves Ramos<sup>3</sup> (ORCID: 0000-0003-4803-7825); Liliane Leal  
11 das Chagas<sup>3</sup> (ORCID: 0000-0002-3099-1162); Maria Nazaré Oliveira Freitas<sup>3</sup> (ORCID: 0000-  
12 0002-5834-9649); Eriene Cristina da Silva Furtado<sup>3</sup> (ORCID: 0000-0003-4609-3655); Jéssica  
13 Cecília Pinheiro Rodrigues<sup>3</sup> (ORCID: 0000-0002-8414-9907); Alexandre do Rosário Casseb<sup>5</sup>  
14 (ORCID: 0000-0001-5615-2423); Lívia Caricio Martins<sup>3</sup> (ORCID: 0000-0002-9400-2036);  
15 \*Joana D’Arc Pereira Mascarenhas<sup>2</sup> (ORCID: 0000-0002-8987-9781)

16  
17 <sup>1</sup>Post-graduate Program in Parasitic Biology in the Amazon, State University of Pará, Belém,  
18 Pará, Brazil

19 <sup>2</sup>Virology Section, Evandro Chagas Institute, Secretarial of Health Surveillance, and Ministry  
20 of Health, Ananindeua, Pará, Brazil

21 <sup>3</sup>Section of Arbovirology and Hemorrhagic Fevers, Evandro Chagas Institute, Secretarial of  
22 Health Surveillance, and Ministry of Health, Ananindeua, Pará, Brazil

23 <sup>4</sup>Health Sciences Institute, Federal University of Pará, Belém, Pará, Brazil

24 <sup>5</sup>Health and Animal Production Institute, Federal Rural University of Amazon, Belém, Pará,  
25 Brazil

26 <sup>6</sup>Biological Science Institute, University of São Paulo, São Paulo, São Paulo, Brazil

27  
28 \***Correspondence:** Joana D’Arc Pereira Mascarenhas, [joana.d.p.mascarenhas@gmail.com](mailto:joana.d.p.mascarenhas@gmail.com)

29  
30 **Keywords:** Avian reoviruses; picobirnaviruses; wild birds; epidemiology.

31  
32 **ABSTRACT**

33

34 Wild birds have great prominence on transmission of diseases to humans, mainly due to their  
35 ease of access to human population, raising concerns about the potential impact of that  
36 proximity in context of the One Health. Studies referring to circulation of avian reovirus (ARV)  
37 and picobirnavirus (PBV) in wild birds are limited, in addition to reinforcing the development  
38 of researches that describe the prevalence, characterize the variants and evaluate the potential  
39 impact of these infections on the wild ecosystem and public health. The present study reports  
40 the occurrence of ARV and PBV in wild birds collected from an environmental protection area  
41 in the Amazon biome. RT-PCR analysis showed ARV infection prevalence in 0.6% (1/155)  
42 and PBV infection in 1.29% (2/155) on the samples. ARV strain isolated in this study  
43 demonstrated more phylogenetically related to other ARVs previously circulating in poultry in  
44 the same region. The two PBV strains obtained belong to genogroup I, and showed  
45 phylogenetically related to other PBV isolated from different animal species in different  
46 geographic regions. This study is a pioneer in the detection of ARV in wild birds in Brazil and  
47 presents a report of the first occurrence of PBV in wild birds of *Guira guira* specie. Additional  
48 studies in wild birds are required to increase the epidemiology, origin, evolution and emergence  
49 of new viruses that may provoke problems in the context of One Health.

50

## 51 INTRODUCTION

52 Wild birds are among the animals that have great prominence in context of disease  
53 transmission to humans. Over the years, these animals approached even closer to humans being,  
54 due to beautiful plumage, songs and colors<sup>1</sup>. The ability to fly propitiate to birds an ease of  
55 access in places close to the human population, however these environments became a local of  
56 high risk to transmission of pathogens to humans, raising concerns about potential impact of  
57 this proximity in context of One Health<sup>2</sup>.

58 Viruses are among the most important clinical and epidemiological pathogens in birds,  
59 as infections that occur in the first weeks of life in avian species are usually of viral etiology<sup>3,4,5</sup>.  
60 Rotaviruses (RV), Avian reoviruses (ARV), Picobirnaviruses (PBV), Avian Influenza viruses  
61 (AIV), Astroviruses (AstV), Coronaviruses (CoV) and West Nile viruses (WNV) are examples  
62 of the most important viruses for global public health. This is due to the potential for dispersal  
63 of wild birds, especially those that have migratory routes<sup>6,7,8,9,10,11,12,13</sup>.

64 ARVs and PBV are frequently reported in infecting poultry, associated with clinical or  
65 subclinical disease, causing seriously economic impacts to poultry industry<sup>14,15,16,17</sup>. ARVs are  
66 described as important agents that provoke gastroenteric diseases, viral arthritis and  
67 tenosynovitis, in birds<sup>18,19</sup>. On the other hand, PBV may be detected in normal or diarrheal

68 excrement from domestic and wild birds, therefore its role as a primary agent of acute  
69 gastroenteritis remain unestablished, reinforcing the importance of studies that had better  
70 characterize the pathogenic aspects of this microorganism.<sup>20,21</sup>.

71 ARVs belong to the family *Reoviridae*, subfamily *Spinareovirinae* and genus  
72 *Orthoreovirus*<sup>22</sup>. Its capsid has 70-85 nm, icosahedral symmetry and it has no lipoprotein  
73 envelope<sup>23</sup>. The genome is composed of ten double-stranded RNA segments (dsRNA)<sup>24</sup>. PBVs  
74 belong to the family *Picobirnaviridae* and the genus *Picobirnavirus*<sup>25</sup>. The viral particle  
75 contains around 33-41 nm, icosahedral symmetry and presents no envelope<sup>26</sup>. Its genome  
76 consists of bi-segmented dsRNA, where segment 2 classifies PBVs into genogroup I (GI),  
77 genogroup II (GII), and non-I and non-II genogroup<sup>27</sup>.

78 In Brazil, there is a lack of research referring to the occurrence of ARV and PBV in  
79 free-living wild birds. Especially species that live in environmental protection areas close to  
80 large urban centers, where there is a great risk of zoonotic transmission of infectious agents due  
81 to the large variety of wild animals present, and their proximity to the human population.  
82 Molecular epidemiology studies are essential to describe the prevalence of infectious agents,  
83 characterizing the variants present and estimate the potential impact of infections on the wild  
84 ecosystem and in public health.

85 In this context, due to the limited studies on the circulation of these viruses in wild birds,  
86 this research described the occurrence of ARV and PBV in wild birds collected from an  
87 environmental protection area in the Amazon biome.

88

## 89 **METHODS**

90

### 91 **Study area**

92 The study area included forest areas close to deforested areas for grassland and/or for  
93 buildings construction, in the territory belonging to Federal Rural University of Amazon  
94 (UFRA) (1° 27' 21" S 48° 26' 12" W). The university UFRA is located in the Environmental  
95 Protection Area of Metropolitan Region of Belém (APA - Metropolitan Belem), which presents  
96 a total protected area of 5.647 hectares (ha) and 56.47 square kilometers (km<sup>2</sup>). APA  
97 (Metropolitana Belém) is an environmental conservation unit of the Pará state for sustainable  
98 use located in the Amazon biome. This environmental conservation area admit a wide variety  
99 of wild animals in preservation, thence human activity is limited.

100

### 101 **Bird capture and collection of clinical specimens**

102 From February to October 2019, birds were collected in three distinct climatic periods  
103 (rainy, dry and intermediate). To the capture, were using mist nets fixed to the ground with  
104 metal wattle, stretched from 5:00 am to 10:00 am, and checked every thirty minutes. After  
105 capture, took note some information as weight and taxonomy based on morphological aspects  
106 (order, family and species), genus (male or female) and life stage (young or adult)<sup>28,29,30</sup>.

107 The birds were kept individually in cardboard boxes lined with aluminum foil paper.  
108 The fecal specimens were collected of the box or through the gentle introduction of sterile swab  
109 directly into the cloaca, placed in cryogenic tubes and stored at -20°C until processing. After  
110 collecting the specimens, the birds were marked with non-toxic ink (Raidex®) to identification  
111 in case of recaptured and after released back into the environment. Due to stress, some birds  
112 died during the process of capture, wherefore it was not possible to collect the feces, the species  
113 were submitted to necropsy and the intestine samples were stored.

114

#### 115 **Viral genome extraction**

116 Suspensions were prepared at 10% by diluting feces and/or intestinal contents in  
117 Tris/HCl/CaCl<sup>2+</sup> buffer (pH 7.2 0.01M), clarified by centrifugation at 4.000 rpm/10 minutes.  
118 The supernatant was submitted to viral genome extraction according to the protocol described  
119 by Boom et al.<sup>31</sup>.

120

#### 121 **Polyacrylamide Gel Electrophoresis (PAGE)**

122 The products of extraction were submitted to PAGE for detection of ARV and PBV by  
123 electrophoretic profiles according to the technique described by Pereira et al.<sup>32</sup>.

124

#### 125 **RT-PCR for ARV**

126 RT-PCR was performed targeting ARV S2 gene. To amplify a partial fragment of 625bp  
127 of the S2 gene, the forward primer PAF (5' - ACT TCT TYT CTA CGC CTT TCG - 3') and the  
128 reverse PAR (5' - ATY AAW DCW CGC ATC TGC TG - 3') were used<sup>33</sup>. To obtain the  
129 complementary DNA strain (cDNA), 4 µL of extracted dsRNA and 2 µL of pair of primers (20  
130 mM) were used. The reaction followed an incubation of 5 minutes at 97°C for denaturation of  
131 the dfRNA, followed by 5 minutes at 0°C for heat shock.

132 Reverse transcription was performed to a final volume of 25 µL. This mix was obtained  
133 by adding 19 µL of RT mixture including 11 µL of DNase/RNase free H<sub>2</sub>O (Hyclone™), 1  
134 µL of dNTPs (20mM, Promega®), 5 µL of buffer (5x, Promega®), 1.5 µL of MgCl<sub>2</sub> (25 mM,  
135 Promega®) and 0.5 µL of RT (4U, Promega®), followed by an incubation at 42°C for 60

136 minutes. After reverse transcription, PCR was performed, adding to the cDNA 25  $\mu$ L of the  
137 PCR mixture containing 15.25  $\mu$ L of H<sub>2</sub>O free DNase and RNase (Hyclone™), 3  $\mu$ L of dNTPs  
138 (20mM, Promega®), 5  $\mu$ L of buffer (5x, Promega®), 1.5  $\mu$ l of MgCl<sub>2</sub> (25mM, Promega®) and  
139 0.25  $\mu$ l of Taq DNA Polymerase (5U, Promega®). The cycling conditions used were described  
140 by Zhang et al.<sup>33</sup>.

141 The amplicons obtained by PCR were performed using agarose gel electrophoresis,  
142 concentration of 1.5% in Tris/Borate/EDTA (TBE) buffer and gel stained with SYBR® Safe  
143 DNA Gel Stain (Invitrogen®). GEL DOC 1000 image processor (Bio-Rad Laboratories, Inc.,  
144 Hercules, CA) performed photo documentation.

145

#### 146 **RT-PCR for PBV**

147 RT-PCR was performed targeting the PBV RdRp gene. To amplify a 201bp genogroup  
148 I fragment, PicoB25 forward primers (5'-GCN TGG GTT AGC ATG GA-3') and PicoB43  
149 reverse (5'-A(GA)T G(CT)T GGT CGA ACT T-3')) were used<sup>34</sup>. For genogroup II, PicoB23  
150 forward primers (5'-CGG TAT GGA TGT TTC-3') and PicoB24 reverse (5'-AAG CGA GCC  
151 CAT GTA-3') were used to amplify fragments of 369bp<sup>34</sup>. To obtain the cDNA, 4  $\mu$ L of  
152 extracted dsRNA and 1  $\mu$ L of primer pair (20mM) were used, followed by 5 minutes incubation  
153 at 97°C for dsRNA denaturation, and 5 minutes of heat shock at 0°C.

154 To the first step, reverse transcription, followed denaturation were added 20  $\mu$ L of the  
155 RT mixture containing 12.25  $\mu$ L of DNase/RNase free H<sub>2</sub>O (Hyclone™), 1  $\mu$ L of dNTPs  
156 (20mM, Promega®), 5  $\mu$ L of buffer (5x, Promega®), 1.5  $\mu$ L of MgCl<sub>2</sub> (25mM, Promega®)  
157 and 0.25  $\mu$ L of RT (4U, Promega®), followed by an incubation at 42°C for 60 minutes. The  
158 second step, PCR, were added to cDNA 25  $\mu$ L of the PCR mixture containing 15.25  $\mu$ L of  
159 DNase/RNase free H<sub>2</sub>O (Hyclone™), 3  $\mu$ L of dNTPs (20mM, Promega®), 5  $\mu$ L of buffer (5x,  
160 Promega®), 1.5  $\mu$ L of MgCl<sub>2</sub> (25mM, Promega®) and 0.25  $\mu$ L of Taq DNA Polymerase (5U,  
161 Promega®). The cycling conditions used were described by Silva et al.<sup>20</sup>.

162 The amplicons obtained by PCR were performed using agarose gel electrophoresis,  
163 concentration of 1.5% in Tris/Borate/EDTA (TBE) buffer and gel stained with SYBR® Safe  
164 DNA Gel Stain (Invitrogen®). GEL DOC 1000 image processor (Bio-Rad Laboratories, Inc.,  
165 Hercules, CA) performed photo documentation.

166

#### 167 **Nested-PCR**

168 Samples that presented amplicons of 201bp in the previous RT-PCR for PBV GI were  
169 submitted to a new RT-PCR followed by a Nested-PCR, to amplify a larger region of the RdRp

170 gene. The forward primers PBV 1.2F (5'-AAG GTC GGK CCR ATGT-3') and reverse PBV  
171 1.2R (5'-TTA TCC CYT TTC ATG CA-3') were used to amplify a fragment of 1229bp<sup>35</sup>. In  
172 Nested-PCR, the Malik-2-FP forward primer (5'-TGG GWT GGC GWG GAC ARG ARGG-  
173 3') and the Malik-2-RP reverse (5'-YSC AYT ACA TCC TCC AC-3') were used, which amplify  
174 a fragment of 580bp of RdRp gene<sup>35</sup>. The cycling conditions used were those described by  
175 Malik et al.<sup>35</sup>.

176

### 177 **Nucleotide sequencing and phylogenetic analysis**

178 Amplicons were purified using the ExoSAP-IT™ kit (Applied Biosystems™) according  
179 to the manufacturer's recommendations. Next purification, the products were subjected to  
180 nucleotide sequencing using RT-PCR/Nested-PCR primers, and the Big Dye Terminator®  
181 v.3.1 kit (Applied Biosystems™) according to the manufacturer's recommendations. Final  
182 reaction was submitted to ABI PRISM 3130 Automated Genetic Sequencer (Applied  
183 Biosystems™).

184 The sequences were edited using BioEdit v.7.2 program, aligned by MEGA v.10.0.537  
185 program<sup>36</sup> and compared with other sequences deposited in GenBank ([www.ncbi.nlm.nih.gov](http://www.ncbi.nlm.nih.gov))  
186 through the Basic Local Alignment Search Tool (BLAST)<sup>37</sup>. Phylogenetic trees were  
187 constructed by MEGA v.10.0.537 program<sup>36</sup> using Neighbor-Joining method and Kimura two-  
188 parameter model<sup>38</sup>. Bootstrap of 2000 replicates was used to phylogenetic groups<sup>39</sup>. Nucleotide  
189 similarities were calculated by Geneious v.10.0.7 program<sup>40</sup>.

190

### 191 **Statistical analysis**

192 Data analysis was executed using BioEstat v.5.3 program<sup>41</sup>. G test and Fisher's exact  
193 statistical test were performed to verify differences in the results of PBV and ARV occurrence  
194 between the categorical variables of this study. Differences were considered significant at 5%.

195

## 196 **RESULTS**

197 A total of 155 clinical specimens from wild free-living birds were collected from  
198 February to October 2019. The fecal specimens were 144 and intestine specimens were 11. The  
199 species belong as following orders: Passeriformes (n=127), Columbiformes (n=9),  
200 Cuculiformes (n=8), Psittaciformes (n=3), Coraciiformes (n=3), Caprimulgiformes (n=3),  
201 Apodiformes (n=1) and Accipitriformes (n=1). All samples were tested by PAGE and RT-PCR  
202 for ARV and PBV.



203 The PAGE test showed negativity for all of the specimens tested. The result presented  
204 no Electrophoretic profile consistent with ARV and PBV, except the positive controls used  
205 during technique.

206 Referring to RT-PCR for ARV S2 gene, 0.6% (1/155) of positivity was observed in a  
207 specimen from a wild bird long-winged-antwren (*Myrmotherula longipennis*). For PBV GI  
208 1.29% (2/155) were positives, from wild bird guira-cuckoo (*Guira guira*). Therefore, there was  
209 no positive samples for PBV GII.

210 Regarding to ARV and PBV positivity among the different study variables, the  
211 statistical analysis did not show significant differences (**Table 1**).

212 The partial sequences of the PBV RdRp gene of the two strains obtained in this study  
213 were compared with other prototype PBV sequences isolated in Brazil and in other countries  
214 and deposited in GenBank. Phylogenetic analysis grouped two strains isolated in this study into  
215 PBV GI, however, the two sequences were heterogeneously related, grouping divergently in  
216 the tree (**Fig. 1**).

217 The strain GI/PBV/Guira-cuckoo/BRA/UFRA-115/2019 grouped with a sequence from  
218 a duck in Australia (MH453875.1), exhibiting a bootstrap of 94%. This grouping was  
219 phylogenetically related to other strains isolated from toucan and chickens in Brazil and South  
220 Korea (bootstrap of 72%).

221 The strain GI/PBV/Guira-cuckoo/BRA/UFRA-114/2019 grouped with a strain from  
222 swine in the USA (MW977305.1), presenting bootstrap of 85%. This cluster presented  
223 phylogenetically related to other PBV isolated from mammals.

224 The homology between PBV sequences of this study represented 59.5% of nucleotide  
225 identity, showing a high genetic diversity. When compared with prototype of PBV sequences,  
226 the values were from 55.0 to 81.4%. The GI/PBV/Guira-cuckoo/BRA/UFRA-115/2019 strain  
227 showed higher nucleotide similarity (81.4%) with a sequence obtained from duck reported in  
228 Australia in 2018 (MH453875.1), and two isolated prototypes from chickens from Brazil and  
229 South Korea (KC865823.1 and KM254161.1), with 76.6 and 75.6%, respectively.

230 The PBV strain (GI/PBV/Guira-cuckoo/BRA/UFRA-114/2019) showed higher  
231 nucleotide similarity, 63.4, 61.9 and 60.7%, with two sequences obtained from chickens in  
232 Brazil (KC865823.1 and KC865829.1), and a prototype obtained from a green monkey  
233 (KY053143.1) reported in 2015 on Saint Kitts and Nevis, an island in the Caribbean.

234 The partial sequence of ARV S2 gene of the present study was compared with other  
235 ARV prototype sequences obtained from domestic birds (chicken, turkey, duck and goose) and  
236 wild birds (pheasant, wild duck, brown-eared bulbul and crow) isolated in Brazil and other

237 countries around the world. The REO/Long-winged-antwren/BRA/UFRA-118/2019 strain was  
238 phylogenetically related to ARV strains previously reported in chickens in Brazil (KY783741.1,  
239 KY783739.1), with a bootstrap of 85% (**Fig. 2**).

240       Regarding to nucleotide identity, S2 gene sequence, in this study, showed from 51.9%  
241 to 86.4% similarity when comparing with prototype ARV sequences used. The highest  
242 homologies observed were sequences obtained from chickens in Brazil (KY783741.1,  
243 KY783743.1, KY783742.1) collected in 2009 and 2010, with 86.4, 86.0 and 85.8% of  
244 similarity. However, the lowest homology was a sequence obtained from brown-eared bulbul  
245 (AB914767.1) isolated in Japan in 2011, with 51.9% of similarity.

246

## 247 **DISCUSSION**

248       ARVs and PBV are among enteric important viruses that have been widely reported  
249 infecting poultry and wild birds, producing noted impacts to poultry economy and wildlife  
250 preservation<sup>7,12,19,20,21,42</sup>. The characteristic of segmented genome of ARV and PBV is an  
251 important factor that contributed to rapid dispersion, evolution and adaptation of these viruses  
252 to different hosts. Therefore, investigation is needed, especially in wild birds, which are known  
253 to be important reservoirs of several infectious agents<sup>26,43,44,45,46</sup>.

254       In the present study, there was no electrophoretic profiles to ARV and PBV in PAGE  
255 migration, corroborating other previous studies involving wild birds specimens in Northern  
256 Brazil, that showed the same result<sup>12,47,48</sup>. However, previous studies in Brazil and other  
257 countries have already characterized electrophoretic profiles of PBV and ARV in poultry  
258 (*Gallus gallus domesticus*), domestic ducks (*Cairina moschata*) and wild birds (*Hypsipetes*  
259 *amaurotis*)<sup>20,44,49</sup>.

260       Several studies have suggested that low frequency of detection of ARV and PBV by  
261 PAGE is associated with limiting factors such as sample quality, time elapsed from collection  
262 to analysis, low viral load in animal feces and host factors such as age and immunological  
263 system<sup>26,50,51</sup>. Although PAGE exhibits limited sensitivity, this technique has been highly  
264 specific, due to the characteristic electropherotype of each virus, several genomic variations  
265 contribute to the difficult detection by primers in RT-PCR<sup>26,52</sup>.

266       The prevalence of PBV by RT-PCR in the present study reported 1.29% of positivity.  
267 Studies carried out in Brazil that investigated the presence of PBV in wild birds found positivity  
268 ranging of 0 - 4.5 %, using the same technique and target gene<sup>12,47,48</sup>. Higher prevalence of PBV  
269 infection were detected in studies with poultries, reported the frequency of 11.76 - 49.41% of



270 positivity in broilers (*Gallus gallus domesticus*), and 51.67% in turkeys (*Meleagris*  
271 *gallopavo*)<sup>20,21,51</sup>.

272 The high positivity of PBV in studies with broilers, especially on poultry farming,  
273 suggest that positivity may be associated to confined system these birds are raised in most of  
274 the time, facilitating viral dispersion between them, due to direct contact with each other<sup>52</sup>. Due  
275 to this study works with free-living wild birds, the probability of virus spread among the species  
276 was reduced, even though some avian species that live in wild environments presents habit of  
277 living in flocks.

278 The low occurrence of PBV was attributed to limitation of primers used in RT-PCR,  
279 which were designed for PBV of human origin<sup>34</sup>. Several studies demonstrated high sensitivity  
280 that initiators in detecting these microorganism and the genogroup in different hosts<sup>35,53</sup>. On the  
281 hand, some studies indicated a limited effectiveness for these initiators<sup>26</sup>. Another important  
282 point to highlight is the existence of other PBVs belonging to different genogroup, which was  
283 not detected by initiators on this study, underestimating the real prevalence of PBV in the  
284 analyzed specimens<sup>48</sup>.

285 The genogroups GI and GII were investigated in wild birds in this study, however GI  
286 was detected in 1.29% of the specimens, corroborating other previous studies<sup>12,47,54</sup>. Chagas<sup>47</sup>  
287 detected GI in wedge-billed-woodcreeper (*Glyphorhynchus spirurus*) captured from a deforested  
288 area in Santa Bárbara city, Pará, Brazil. Duarte Júnior et al.<sup>12</sup> detected GI in a sample from  
289 toucan (*Rhamphastus sp.*) with diarrhea symptoms, and treated in a veterinary hospital in  
290 Castanhal city, Pará, Brazil. In Australia, a study characterized three PBV sequences of GI from  
291 fecal specimens from Australian duck (*Tadorna tadornoides*)<sup>54</sup>.

292 The prevalence of ARV in wild birds in the present study was 0.6% (1/155), showing  
293 divergence when compared with other previous studies<sup>55,56</sup>. In Brazil, only two studies  
294 investigated ARV S2 gene in wild bird fecal specimens, however no positivity was reported<sup>47,48</sup>.  
295 Silva<sup>52</sup> described positivity in 32.9% (28/85) in poultry fecal specimens raising on poultry  
296 farming, for the ARV S2 gene. In 2019, a report in Egypt found ARV prevalence of 33.3%  
297 (5/15) in poultry, to S2 gene as a target<sup>56</sup>. This study is the first report regarding to occurrence  
298 of ARV in wild free-ranging birds in Brazilian territory.

299 In studies that reported high prevalence of ARV infection, specimens come from birds  
300 with clinical signs of infection, such as arthritis, tenosynovitis, enteric syndromes, in addition  
301 to more severe cases when central nervous system is compromised and death<sup>24,55</sup>. In USA, Lu  
302 et al.<sup>7</sup> investigated ARV from tendons, synovial tissues and viscera from chickens, turkeys,  
303 partridges, quails and pheasants, that presented clinical signs, and all of 311 specimens analyzed

304 on that study were positive for ARV. In the present study, no clinical signs information was  
305 collected, therefore this aspect was not considered on discussion.

306 Reports in regard to occurrence of ARV in domestic and wild birds seem limited,  
307 focusing on describing molecular epidemiology in birds, experimental aspects of ARV  
308 infection in animal models, viral isolation in cell culture, and complete genome sequencing of  
309 specific strains<sup>8,42,44,57,58</sup>. Therefore, the present study contribute to understanding molecular  
310 epidemiology of ARV in free-living wild birds.

311 Studies related to PBV described that strains isolated in geographically distinct locations  
312 and from different hosts presented greater phylogenetic relationship between them, when  
313 compared with strains isolated in the same study and in the same region<sup>20,21,35,54,59</sup>. The findings  
314 of this study corroborate the literature in relation to rapid spread, evolution and adaptation of  
315 PBV, which suggest that the great similarity between lineages belonging to different geographic  
316 regions may be related to sharing of the same ancestor and also reduction of trade barriers  
317 between countries<sup>26,51</sup>.

318 PBV strains isolated in this study were collected from wild birds belong the same species  
319 (*Guira guira*), captured on the same day and location, and the great genetic diversity observed  
320 corroborates heterogeneous nature of PBVs described on literature. Several factors are  
321 considered responsible of high genetic diversity of PBVs, such as small size of the analyzed  
322 fragment, genetic variability, multiple interspecies transmissions and genetic rearrangement  
323 events between segments of different PBV strains<sup>20,26,51</sup>.

324 PBV GI shows a worldwide distribution pattern and has been reported to infect a variety  
325 of hosts such as mammals, birds, reptiles, and even fish<sup>60,61,62,63</sup>. The phylogenetic grouping of  
326 PBV GI isolated from different hosts indicates these viruses are not species specific, although,  
327 they can transmit from one host to another<sup>21,35,47</sup>. The great genetic similarity observed between  
328 PBV strains isolated from different hosts raises increasing concerns about the zoonotic potential  
329 of this virus in the context of One Health<sup>26,64</sup>.

330 Silva<sup>52</sup>, in studies with S2 gene in poultry, showed that phylogenetic analysis in 13 of  
331 15 ARV strains isolated reported more phylogenetically related to each other, while two of them  
332 showed more divergence in the tree, and were closer to the ARV prototypes of chicken, turkey  
333 and ostrich used in comparison. All of 15 strains showed a nucleotide homology of 90.1-100%  
334 between them, and 90.9-94.4% with the reference prototypes achieved from other production  
335 birds around the world, demonstrating the high degree of nucleotide similarity that strains of  
336 ARVs obtained in the same location presented among them, and with strains isolated from  
337 different geographic regions.

338 The high nucleotide identity and phylogenetic inference showed that ARV strain  
339 isolated from the wild bird long-winged-antwren (*Myrmotherula longipennis*) in the present  
340 study was more related to ARV strains circulated for some years in poultry on the same region  
341 than strains circulated in other countries of the world. These findings suggest that ARV strains  
342 circulating in the same region may be adapted to the environment over the years, and ARV  
343 transmission between domestic and wild birds may occur on nature, as commercial poultry  
344 farming normally localized in rural environments close to wild environments, favoring close  
345 contact between these animals and the transmission of pathogens.

346 The occurrence of ARV and PBV in wild birds corroborated studies that also identified  
347 the circulation of these viruses in population of birds. The findings reported here suggest that  
348 the wild species of birds: *Guira guira* and *Myrmotherula longipennis* may act as reservoirs of  
349 PBV and ARV infection, respectively. Furthermore, even these birds are not considered  
350 migratory, they may still act as possible dispersion agents for these viruses in wild and urban  
351 environments.

352 The wild birds were collected in an Environmental Protection Area (APA), which  
353 consists of an extensive forest fragment with limited human activity and wildlife preservation.  
354 The circulation of ARV and PBV in this environment demonstrated the cycles of these agents  
355 occur naturally in the wild ecosystem and the fact that APA – Metropolitana Belém be formed  
356 by several populated neighborhoods and poor basic sanitation infrastructure, possible events  
357 transmission between avian species and humans can trigger.

358 In conclusion, this study is a pioneer in the detection of ARV in wild birds in Brazil,  
359 reporting for the first time the occurrence of PBV in wild species of bird *Guira guira*.  
360 Additional studies about epidemiological monitoring of infectious agents in wild birds are  
361 necessary, especially when involving segmented genome viruses, where processes of  
362 transmission, evolution and adaptation to new environments and hosts occur faster. Molecular  
363 characterization and phylogenetic analysis support to understand the epidemiology, origin,  
364 evolution and emergence of new viruses that may pose problems in the context of One Health.

365

#### 366 **Author contributions**

367 **Methodology:** Pereira, D., Souto, L.C.S., Guerra, S.F.S., Penha-Júnior, E.T., Lobo, P.S.,  
368 Ramos, B.A., Chagas, L.L., Freitas, M.N.O., Furtado, E.C.S., Rodrigues, J.C.P. **Investigation:**  
369 Pereira, D., Souto, L.C.S., Guerra, S.F.S., Penha-Júnior, E.T., Lobo, P.S., Ramos, B.A., Chagas,  
370 L.L., Freitas, M.N.O., Furtado, E.C.S., Rodrigues, J.C.P. **Data analysis:** Pinheiro, H.H.C. **Data**  
371 **curation:** Pinheiro, H.H.C., Guimarães, R.J.P.S. **Writing - Original Draft:** Pereira, D.

372 **Writing - Proofreading and Editing:** Mascarenhas, J.D.P., Chagas, E.H.N. **Supervision:**  
373 Mascarenhas, J.D.P., Guerra, S.F.S., Soares, L.S. **Project administration:** Mascarenhas,  
374 J.D.P., Martins, L.C., Casseb, A.R.

375

#### 376 **Conflicts of interest**

377 The authors declare no conflicts of interest.

378

#### 379 **Funding information**

380 Pereira, D., Souto, L.C.S., Chagas, E.H.N and Rodrigues, J.C.P are recipients of scholarships  
381 from the Coordination for the Improvement of Higher Education Personnel (CAPES); Ramos,  
382 B.A and Mascarenhas, J.D.P are recipients of grants from the National Council for Scientific  
383 and Technological Development (CNPq).

384

#### 385 **Ethical statement**

386 This study is linked to the research project entitled "Epidemiological monitoring of infectious  
387 agents in free-ranging birds (class of birds - Linnaeus 1758) and hematophagous arthropods  
388 (phylum Arthropoda - Latreille 1829) of the Federal Rural University of Amazon, campus  
389 Belém campus", according to the ethical principles of animal experiments. The project was  
390 approved by the Ethics Committee on the Use of Animals of the Federal Rural University of  
391 Amazon (CEUA/UFRA), certificate number 025/18, and by Biodiversity Information and  
392 Authorization System (SISBIO), under opinion nº 63488 -1.

393

#### 394 **Acknowledgment**

395 The authors thank the technical support of Gastroenteric Viruses Laboratory (LGAST) on the  
396 Virology Section of Evandro Chagas Institute, Secretarial of Health Surveillance, and Ministry  
397 of Health. The technical team of the Section of Arbovirology and Hemorrhagic Fevers of  
398 Evandro Chagas Institute, and the Molecular Biology Laboratory of the Institute of Health and  
399 Animal Production of the Federal Rural University of Amazon.

400

#### 401 **REFERENCES**

402

- 403 1. Santos GGC, Matuella GA, Coraiola AM, Silva LCS, Lange RR, Santin E. Doenças de  
404 aves selvagens diagnosticadas na Universidade Federal do Paraná (2003-2007). *Pesq Vet*  
405 *Bras* 2008;28:565-570.

406

407 2. Morais ABC. Ocorrência de patógenos de origem bacteriana e viral e marcadores de  
408 virulência de *Escherichia coli* e *Rhodococcus equi* isolados das fezes de aves silvestres de  
409 cativeiro da fauna brasileira. Dissertação (Mestrado em Medicina Veterinária) –  
410 Botucatu, Universidade Estadual Paulista, 2014. 81p.

411

412 3. Alfieri AF, Tamehiro CY, Alfieri AA. Virus entérico RNA fita dupla, segmentado, em  
413 aves: rotavirus, reovirus e picobirnavirus. *Semina* 2000;21:101-103.

414

415 4. Luz MA, Bezerra DA, Silva RR, Guerreiro AN, Seixas LS, Bastos RKG, Mascarenhas  
416 JDP, Moraes CCG, Souza NF, Meneses AMC. Rotavirus research in Amazon wild birds  
417 kept in captivity in the state of Pará, Brazil. *Rev Bras Med Vet* 2014;36:167-173.

418

419 5. Santos PMS, Silva SGN, Fonseca CF, Oliveira JB. Parasitos de aves e mamíferos silvestres  
420 em cativeiro no estado de Pernambuco. *Pesq Vet Bras* 2015;35:788-794.

421

422 6. Bezerra DAM, Silva RR, Kaiano JHL, Oliveira DS, Gabbay YB, Linhares AC,  
423 Mascarenhas JDP. Detection, epidemiology and characterization of VP6 and VP7 genes  
424 of group D rotavirus in broiler chickens. *Avian Pathol* 2014;43:238-243.

425

426 7. Lu H, Tang Y, Dunn PA, Wallner-Pendleton EA, Lin L, Knoll EA. Isolation and  
427 molecular characterization of newly emerging avian reovirus variants and novel strains in  
428 Pennsylvania, USA, 2011–2014. *Sci Rep-UK* 2015;5:14727.

429

430 8. Noh JY, Lee DH, Lim TH, Lee JH, Day JM, Song CS. Isolation and genomic  
431 characterization of a novel avian orthoreovirus strain in Korea, 2014. *Arch Virol*  
432 2018;163:1307-1316.

433

434 9. El Taweel A, Kandeil A, Barakat A, Rabiee OA, Kayali G, Ali MA. Diversity of  
435 Astroviruses Circulating in Humans, Bats, and Wild Birds in Egypt. *Viruses*  
436 2020;12:485.

437

- 438 10. Hassan MM, El-Zowalaty ME, Islam A, Khan SA, Rahman MK, Jarhult JD, Hoque MA.  
439 Prevalence and Diversity of Avian Influenza Virus Hemagglutinin Sero-Subtypes in  
440 Poultry and Wild Birds in Bangladesh. *Vet Sci* 2020;7:73.  
441
- 442 11. Vidaña B, Busquets N, Napp S, Pérez-Ramírez E, Jiménez-Clavero MA, Johnson N. The  
443 Role of Birds of Prey in West Nile Virus Epidemiology. *Vaccines* 2020;8:550.  
444
- 445 12. Duarte-Júnior JWB, Chagas EHN, Serra ACS, Souto LCS, Penha-Júnior ET, Bandeira  
446 RS, Guimarães RJPS, Oliveira HGS, Sousa TKS, Lopes CTA, Domingues SFS, Pinheiro  
447 HHC, Malik YS, Salvarani FM, Mascarenhas JDP. Occurrence of rotavirus and  
448 picobirnavirus in wild and exotic avian from amazon Forest. *PLoS Negl Trop Dis*  
449 2021;15:e0008792.  
450
- 451 13. Rahman MM, Talukder A, Chowdhury MMH, Talukder R, Akter R. Coronaviruses in  
452 wild birds – A potential and suitable vector for global distribution. *Vet Med Sci*  
453 2021;7:264-272.  
454
- 455 14. Jindal N, Patnayak DP, Chander Y, Ziegler AF, Goyal SM. Detection and molecular  
456 characterization of enteric viruses from poult enteritis syndrome in turkeys. *Poultry Sci*  
457 2010;89:217-226.  
458
- 459 15. Day JM, Zsak L. Molecular characterization of enteric picornaviruses in archived turkey  
460 and chicken samples from the United States. *Avian Dis* 2016;60:500-505.  
461
- 462 16. Tang Y, Lin L, Sebastian A, Lu H. Detection and characterization of two co-infection  
463 variant strains of avian orthoreovirus (ARV) in young layer chickens using next-  
464 generation sequencing (NGS). *Sci Rep-UK* 2016;6:24519.  
465
- 466 17. Pankovics P, Boros A, Nemes C, Kapusinszky B, Delwart E, Reuter, G. Molecular  
467 characterization of a novel picobirnavirus in a chicken. *Arch Virol* 2018;163:3455-3458.  
468
- 469 18. Davis JF, Kulkarni A, Fletcher O. Reovirus infections in young broiler chickens. *Avian*  
470 *Dis* 2013;57:321-325.  
471



- 472 19. Assunção TRS, Palka APG, Pavoni DP. Reovirose aviária: um panorama. *Rev Educ*  
473 *Contin Med Vet Zootec CRMV-SP* 2018;16:48-59.  
474
- 475 20. Silva RR, Bezerra DAM, Kaiano JHL, Oliveira DS, Silvestre RVD, Gabbay YB, Ganesh  
476 B, Mascarenhas JDP. Genogroup I avian picobirnavirus detected in Brazilian broiler  
477 chickens: a molecular epidemiology study. *J Gen Virol* 2014;95:117-122.  
478
- 479 21. Verma H, Mor SK, Erber J, Goyal SM. Prevalence and complete genome characterization  
480 of turkey picobirnaviruses. *Infect Gen Evol* 2015;30:134-139.  
481
- 482 22. International Committee on Taxonomy of Viruses (ICTV). ICTV Taxonomy history:  
483 *Orthoreovirus*. 2019. Disponível em: <[https://talk.ictvonline.org/taxonomy/p/taxonomy-](https://talk.ictvonline.org/taxonomy/p/taxonomy-history?taxnode_id=201904969)  
484 [history?taxnode\\_id=201904969](https://talk.ictvonline.org/taxonomy/p/taxonomy-history?taxnode_id=201904969)>. Acesso em: 09/10/2021.  
485
- 486 23. Jones RC. Avian reovirus infections. *Rev Sci Tech Oie* 2000;19:614-619.  
487
- 488 24. Dandár E, Bálint A, Kecskeméti S, Szentpáli-Gavallér K, Kiszfali P, Melegh B, Farkas  
489 SL, Bányai K. Detection and characterization of a divergent avian reovirus strain from a  
490 broiler chicken with central nervous system disease. *Arch Virol* 2013;158:2583-2588.  
491
- 492 25. International Committee on Taxonomy of Viruses (ICTV). ICTV Taxonomy history:  
493 *Picobirnavirus*. 2019. Disponível em: < [https://talk.ictvonline.org/taxonomy/p/taxonomy-](https://talk.ictvonline.org/taxonomy/p/taxonomy-history?taxnode_id=201904333)  
494 [history?taxnode\\_id=201904333](https://talk.ictvonline.org/taxonomy/p/taxonomy-history?taxnode_id=201904333)>. Acesso em: 09/10/2020.  
495
- 496 26. Ganesh B, Masachessi G, Mladenova Z. Animal picobirnavirus. *Virusdisease*  
497 2014;25:223-238.  
498
- 499 27. Nates SV, Gatti MSV, Ludert JE. The picobirnavirus: an integrated view on its biology,  
500 epidemiology and pathogenic potential. *Future Virol* 2011;6:223-235.  
501
- 502 28. Gwynne JA, Ridgely RS, Argel M, Tudor G. Guia Aves do Brasil: Pantanal & Cerrado.  
503 São Paulo: Editora Horizonte, 2010, p. 336.  
504

- 505 29. Comitê Brasileiro de Registros Ornitológicos (CBRO). Lista de aves do Brasil. 11<sup>o</sup>  
506 edição. 2014. Disponível em: <<http://www.cbro.org.br>>. Acesso em: 14/12/2021.  
507
- 508 30. Sigrist T. Guia de Campo Avis Brasilis: Avifauna Brasileira. Pranchas, 2014.  
509
- 510 31. Boom R, Sol CJA, Salimans MMM, Jansen CL, Wertheim-Van Dillen PME, Van Der  
511 Noordaa J. Rapid and simple method for purifications of nucleic acids. *J Clin Microbiol*  
512 1990;28:495-503.  
513
- 514 32. Pereira HG, Azevedo RS, Leite JP, Barth OM, Suttmoller F, Farias V, Vidal MN.  
515 Comparison of polyacrylamide gel electrophoresis (PAGE), immuno-electron  
516 microscopy (IME) and enzyme immunoassay (EIA) for the rapid diagnosis of rotavírus  
517 infection in children. *Mem I Oswaldo Cruz* 1983;78:483-490.  
518
- 519 33. Zhang Y, Liu M, Shuidong O, Hu QL, Guo DC, Chen HY, Han Z. Detection and  
520 identification of avian, duck, and goose reoviruses by RT-PCR: goose and duck  
521 reoviruses are part of the same genogroup in the genus Orthoreovirus. *Arch Virol*  
522 2006;151:1525-1538.  
523
- 524 34. Rosen BI, Fang ZY, Glass RI, Monroe SS. Cloning of human picobirnavirus genomic  
525 segments and development of an RT-PCR detection assay. *Virology* 2000;277:316-329.  
526
- 527 35. Malik YS, Sircar S, Dhama K, Singh R, Ghosh S, Bányai K, Vlasova AN, Nadia T, Singh  
528 RK. Molecular epidemiology and characterization of picobirnaviruses in small ruminant  
529 populations in India. *Infect Genet Evol* 2018;63:39-42.  
530
- 531 36. Tamura K, Stecher G, Peterson D, Filipski A, Kumar S. MEGA6: molecular evolutionary  
532 genetics analysis version 6.0. *Mol Biol Evol* 2013;30:2725-2729.  
533
- 534 37. Altschul SF, Gish W, Miller W, Myers EW, Lipman DJ. Basic local alignment search  
535 tool. *J Mol Biol* 1990;215:403-410.  
536
- 537 38. Kimura M. A simple method for estimating evolutionary rates of base substitutions  
538 through comparative studies of nucleotide sequences. *J Mol Evol* 1980;16:111-120.

539

540 39. Felsenstein J. Confidence limits on phylogenies: An approach using the bootstrap.  
541 *Evolution* 1985;39:783-791.

542

543 40. Kearse M, Moir R, Wilson A, Stones-Havas S, Cheung M, Sturrock S, Thierer T. Geneious  
544 Basic: an integrated and extendable desktop software platform for the organization and  
545 analysis of sequence data. *Bioinformatics* 2012;28:1647-1649.

546

547 41. Ayres M, Ayres JRM, Ayres DL, Santos AAS. BioEstat: Aplicações estatísticas nas áreas  
548 das ciências biomédicas. 5ª Edição. 2007. Instituto de Desenvolvimento Sustentável  
549 Mamirauá, Belém, Pará, Brasil.

550

551 42. Wang H, Gao B, Chen H, Diao Y, Tang Y. Isolation and characterization of a variant duck  
552 orthoreovirus causing spleen necrosis in Peking ducks, China. *Transbound Emerg Dis*  
553 2019;66:2033-2044.

554

555 43. Wong AH, Cheng PKC, Lai MYY, Leung PCK, Wong KKY, Lee WY, Lim WWL.  
556 Virulence potential of fusogenic orthoreoviruses. *Emerg Infect Dis* 2012;18:944.

557

558 44. Ogasawara Y, Ueda H, Kikuchi N, Kirisawa R. Isolation and genomic characterization of  
559 a novel orthoreovirus from a brown-eared bulbul (*Hypsipetes amaurotis*) in Japan. *J Gen*  
560 *Virol* 2015;96:1777-1786.

561

562 45. McDonald SM, Nelson MI, Turner PE, Patton JT. Reassortment in segmented RNA  
563 viruses: mechanisms and outcomes. *Nat Rev Microbiol* 2016;4:448-460.

564

565 46. De Sousa TN, Silva RVS, Evangelista BBC, Freire SM. Prevalência das zoonoses  
566 parasitárias e a sua relação com as aves silvestres no nordeste do Brasil. *J Interdiscip*  
567 *Biociênc* 2018;3:39-44.

568

569 47. Chagas EHN. Pesquisa de picobirnavírus e reovírus em espécimes fecais de animais das  
570 mesorregiões metropolitana de Belém e nordeste do estado do Pará no período de 2014 a  
571 2016. Dissertação (Mestrado em Virologia) – Ananindeua, Instituto Evandro Chagas,  
572 2018. 91p.

573

574 48. Guerreiro AN, Moraes CCG, Marinho ANR, Barros BCV, Bezerra DAM, Bandeira RS,  
575 Silva RR, Rocha DCC, Meneses AMC, Luz MA, Paz GS, Mascarenhas JDP.

576 Investigation of enteric viruses in the feces of neotropical migratory birds captured on the  
577 coast of the State of Pará, Brazil. *Braz J Poultry Sci* 2018;20:161-168.

578

579 49. Yun T, Yu B, Ni Z, Ye W, Chen L, Hua J, Zhang C. Isolation and genomic  
580 characterization of a classical Muscovy duck reovirus isolated in Zhejiang, China. *Infect*  
581 *Genet Evol* 2013;20:444-453.

582

583 50. Masachessi G, Martinez LC, Giordano MO, Barril PA, Isa BM, Ferreyra L, Villareal D,  
584 Carello M, Asis C, Nates, S.V. Picobirnavirus (PBV) natural hosts in captivity and virus  
585 excretion pattern in infected animals. *Arch Virol* 2007;152:989-998.

586

587 51. Ribeiro AF, Silva RR, Bezerra DAM, Bandeira RS, Penha-Júnior ET, Castro CMO,  
588 Mascarenhas JDP. Picobirnavirus genogroup 2 in broiler chickens of the metropolitan  
589 Belém mesoregion-PA–Brazil. *Braz J Anim Env Res* 2019;2:2033-2050.

590

591 52. Silva RR. Detecção, epidemiologia e análise molecular de rotavírus, picobirnavírus e  
592 reovírus em aves de corte criadas em granjas na mesorregião metropolitana de Belém,  
593 Pará, Brasil. Tese (Doutorado em Doenças Tropicais) – Belém, Federal University of  
594 Pará, 2012. 153p.

595

596 53. Woo PCY, Teng JLL, Bai R, Tang Y, Wong AYP, Li KSM, Lam CSF, Fan RYY, Lau  
597 SKP, Yuen KY. Novel picobirnaviruses in respiratory and alimentary tracts of cattle and  
598 monkeys with large intra-and inter-host diversity. *Viruses* 2019;11:574.

599

600 54. Wille M, Eden JS, Shi M, Klaassen M, Hurt AC, Holmes EC. Virus–virus interactions  
601 and host ecology are associated with RNA virome structure in wild birds. *Mol Ecol*  
602 2018;27:5263-5278.

603

604 55. Styś-Fijoł N, Kozdruń W, Czekaj H. Detection of avian reoviruses in wild birds in  
605 Poland. *J Vet Res* 2017;61: 239-245.

606

- 607 56. Al-Ebshahy E, Mohamed S, Abas O. First report of seroprevalence and genetic  
608 characterization of avian orthoreovirus in Egypt. *Trop Anim Health Prod* 2019;52:1049-  
609 1054.
- 610
- 611 57. Bányai K, Dandár E, Dorsey KM, Mató T, Palya V. The genomic constellation of a novel  
612 avian orthoreovirus strain associated with runting-stunting syndrome in broilers. *Virus*  
613 *Genes* 2011;42:82-89.
- 614
- 615 58. Reck C, Menin A, Pilati C, Miletti LC. Características clínicas e anatomo-  
616 histopatológicas da infecção experimental mista por Orthoreovirus aviario e Mycoplasma  
617 synoviae em frangos de corte. *Pesqui Vet Brasil* 2012;32:687-691.
- 618
- 619 59. Lima DA, Cibulski SP, Tochetto C, Varela APM, Finkler F, Teixeira TF, Loiko MR,  
620 Cerva C, Junqueira DM, Mayer FQ, Roehe PM. The intestinal virome of malabsorption  
621 syndrome-affected and unaffected broilers through shotgun metagenomics. *Virus Res*  
622 2019;261:9-20.
- 623
- 624 60. Masachessi G, Martinez LC, Ganesh B, Giordano MO, Barril PA, Isa MB, Ibars A,  
625 Pavan JV, Nates SV. Establishment and maintenance of persistent infection by  
626 picobirnavirus in greater rhea (*Rhea Americana*). *Arch Virol* 2012;157:2075-2082.
- 627
- 628 61. Navarro R, Chan Y, Nair R, Peda A, Aung MS, Ketzis J, Malik YS, Kobayashi N, Ghosh  
629 S. Molecular characterization of complete genomic segment-2 of picobirnavirus strains  
630 detected in a cat and a dog. *Infect Genet Evol* 2017;54:200-204.
- 631
- 632 62. Kumar N, Mascarenhas JDP, Ghosh S, Masachessi G, Bandeira RS, Nates SV, Dhama K,  
633 Singh RK, Malik YS. Picobirnavirus. In: Animal-Origin Viral Zoonoses. Y.S, Malik.;  
634 R.K, Singh.; K, Dhama. 1<sup>a</sup> ed. Singapura: Springer Singapore, 2020, p. 291-312.
- 635
- 636 63. Ramesh A, Bailey ES, Ahyong V, Langelier C, Phelps M, Neff N, Sit R, Tato C, Derisi  
637 JL, Greer AG, Gray GC. Metagenomic characterization of swine slurry in a North  
638 American swine farm operation. *Sci Rep* 2021;11:16994.
- 639

640 64. Kashnikov AY, Epifanova NV, Novikova NA. Picobirnaviruses: prevalence, genetic  
641 diversity, detection methods. *Vavilov Journal of Genetics and Breeding* 2020;24:661-672.

642

## 643 FIGURES AND TABLES

644

645 **Table 1.** Statistical analysis of the frequency of ARV and PBV positivity in wild birds  
646 according to the different variables of this study. ND - Not defined; p - Probability value  
647 calculated by statistical test; \*Test G; # Exact test of Fisher.

648

649 **Fig. 1.** Phylogenetic tree based on partial sequence alignment of PBV RdRp gene. The  
650 sequences of this study are represented in bold. The numbers next to the nodes indicate bootstrap  
651 values >70%. The scale bar is proportional to phylogenetic distance. The prototype strain  
652 GII/PBV/Human/USA/4-GA-91/2000 (AF246940.1) was used as an external group to better  
653 understand the phylogenetic relationships between the strains. The phylogenetic tree was  
654 constructed using Neighbor-Joining method and Kimura two-parameter model, with bootstrap  
655 of 2000 replicas to give consistency to the phylogenetic groups.

656

657 **Fig. 2.** Phylogenetic tree based on the alignment of partial sequences of the ARV S2 gene. The  
658 sequence of the present study is represented in bold. The numbers next to the nodes indicate  
659 bootstrap values >70%. The scale bar is proportional to phylogenetic distance. The strain  
660 REO/Bat/SLO/SI-MRV04/2009 (MG457105.1) represents a prototype of MRV and was used  
661 as an outgroup to better understand the phylogenetic relationships between the strains. The  
662 phylogenetic tree was constructed using Neighbor-Joining method and Kimura two-parameter  
663 model, with bootstrap of 2000 replicas to give consistency to the phylogenetic groups.

664

665

666

667

668

669

670

671

672



**Table 1**

| Variable               | PBV      |     |          |       | p                  | ARV      |     |          |       | p                  |
|------------------------|----------|-----|----------|-------|--------------------|----------|-----|----------|-------|--------------------|
|                        | Positive |     | Negative |       |                    | Positive |     | Negative |       |                    |
|                        | n        | %   | n        | %     |                    | n        | %   | n        | %     |                    |
| <b>Sex</b>             |          |     |          |       | 0,383*             |          |     |          |       | 0,320*             |
| Female                 | 0        | 0,0 | 26       | 100,0 |                    | 0        | 0,0 | 26       | 100,0 |                    |
| Male                   | 0        | 0,0 | 50       | 100,0 |                    | 1        | 2,0 | 49       | 98,0  |                    |
| ND                     | 2        | 2,5 | 77       | 97,5  |                    | 0        | 0,0 | 79       | 100,0 |                    |
| <b>Age group</b>       |          |     |          |       | 0,980*             |          |     |          |       | 0,922*             |
| Young                  | 0        | 0,0 | 11       | 100,0 |                    | 0        | 0,0 | 11       | 100,0 |                    |
| Adult                  | 2        | 1,4 | 141      | 98,6  |                    | 1        | 0,7 | 142      | 99,3  |                    |
| ND                     | 0        | 0,0 | 1        | 100,0 |                    | 0        | 0,0 | 1        | 100,0 |                    |
| <b>Sample type</b>     |          |     |          |       | 1,000 <sup>#</sup> |          |     |          |       | 0,405 <sup>#</sup> |
| Feces                  | 2        | 1,4 | 142      | 98,6  |                    | 1        | 0,7 | 143      | 99,3  |                    |
| Intestine              | 0        | 0,0 | 11       | 100,0 |                    | 0        | 0,0 | 11       | 100,0 |                    |
| <b>Climatic period</b> |          |     |          |       | 0,168*             |          |     |          |       | 0,301*             |
| Rainy                  | 0        | 0,0 | 39       | 100,0 |                    | 0        | 0,0 | 39       | 100,0 |                    |
| Dry                    | 0        | 0,0 | 69       | 100,0 |                    | 0        | 0,0 | 69       | 100,0 |                    |
| Intermediary           | 2        | 4,3 | 45       | 95,7  |                    | 1        | 2,1 | 46       | 97,9  |                    |

**Fig.1.**

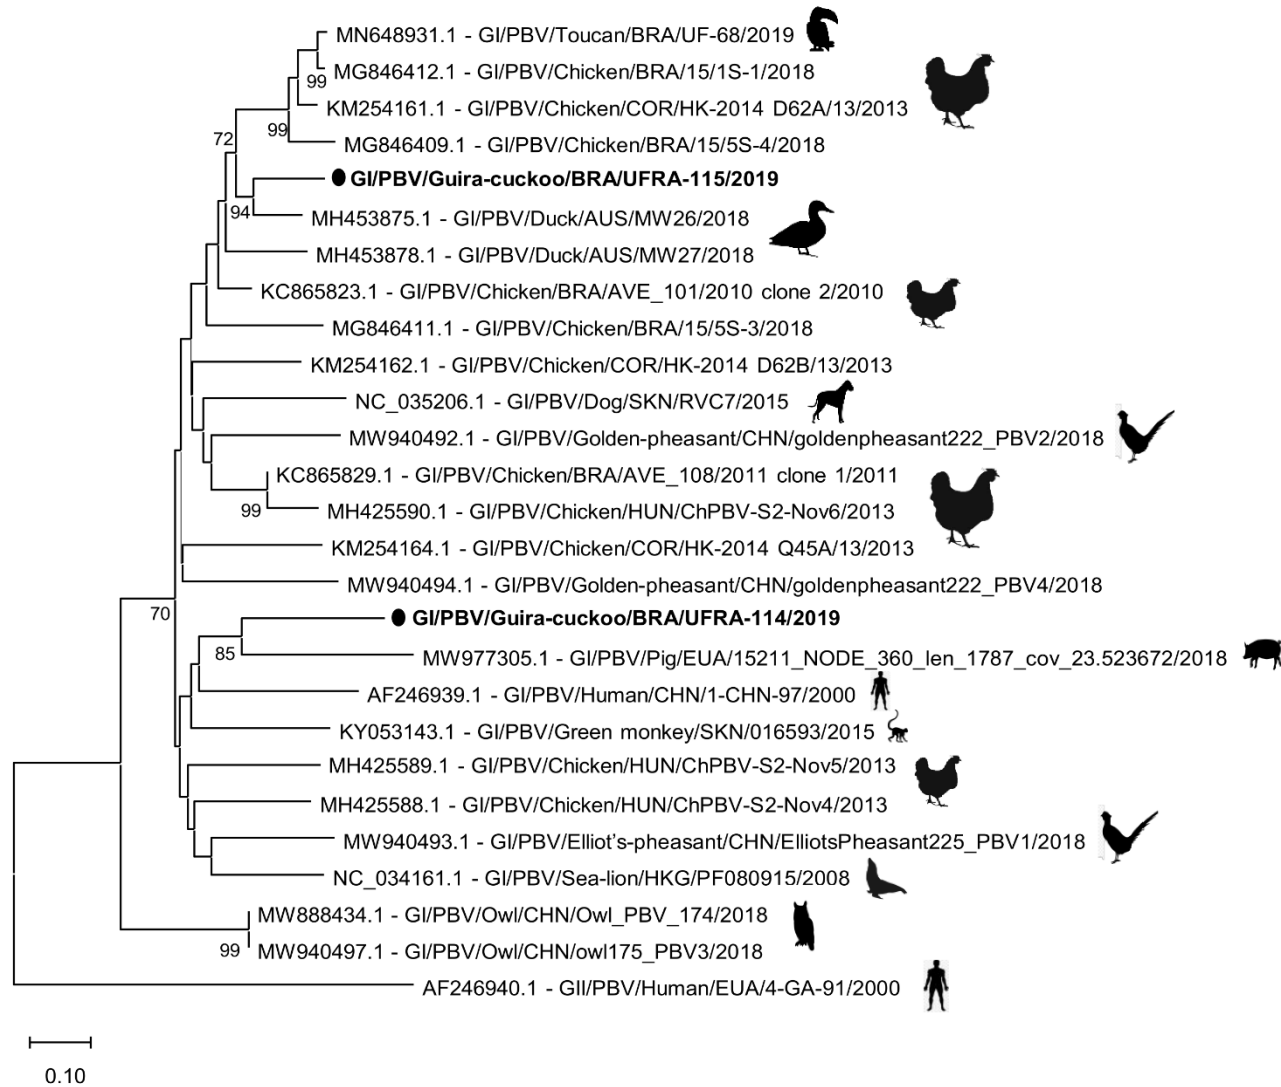

Fig. 2.

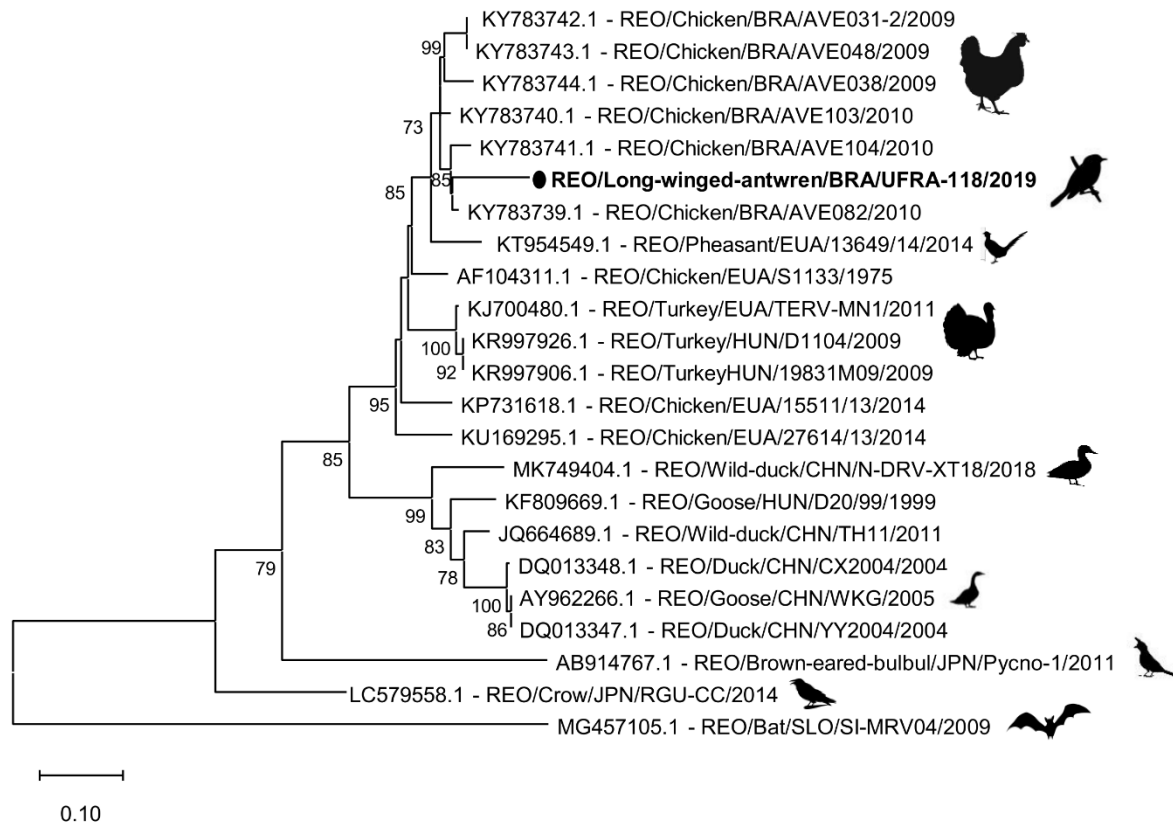

Source: http://biorxiv.org/content/10.1101/2022.01.11.475455v1.full.pdf
